# Supplementary material for: Boosting the catalytic activity via an acid–base synergistic effect for direct conversion of CO2 and methanol to dimethyl carbonate
Source: Royal Society of Chemistry journal article supplement (doi:10.1039/d4nj01567c), 2024-01-01
Supplement: d4nj01567c1.pdf [file d4nj01567c1.pdf]

## Supporting Information

# Boosting the catalytic activity via acid-base synergistic effect for CO<sub>2</sub> and methanol direct to dimethyl carbonate

Tian-Tian Huang,<sup>a,b</sup> Yu-Ping Xu,<sup>a</sup> Zheng-Lan Bai,<sup>a</sup> Ming-Sheng Wang,<sup>a</sup> Bin-Wen Liu,<sup>a</sup>  
Zhong-Ning Xu,<sup>\*a</sup> Guo-Cong Guo,<sup>\*a</sup>

<sup>a</sup> State Key Laboratory of Structural Chemistry, Fujian Institute of Research on the Structural of Matter, Chinese Academy of Sciences, Fuzhou, Fujian 350002 (P. R. China)

<sup>b</sup> University of Chinese Academy of Sciences, Beijing 100049 (P. R. China)

Corresponding Author E-mail: [gcguo@fjirsm.ac.cn](mailto:gcguo@fjirsm.ac.cn), [znxu@fjirsm.ac.cn](mailto:znxu@fjirsm.ac.cn)

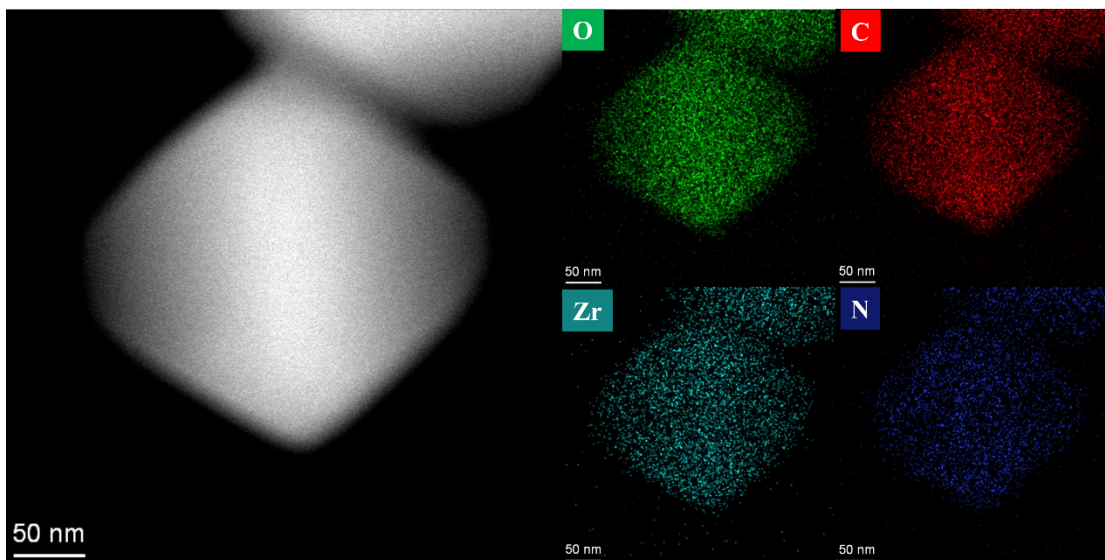

**Fig. S1** TEM images and EDS images of MOF-808.

The N element in MOF-808 comes from a very small residue of the solvent DMF.

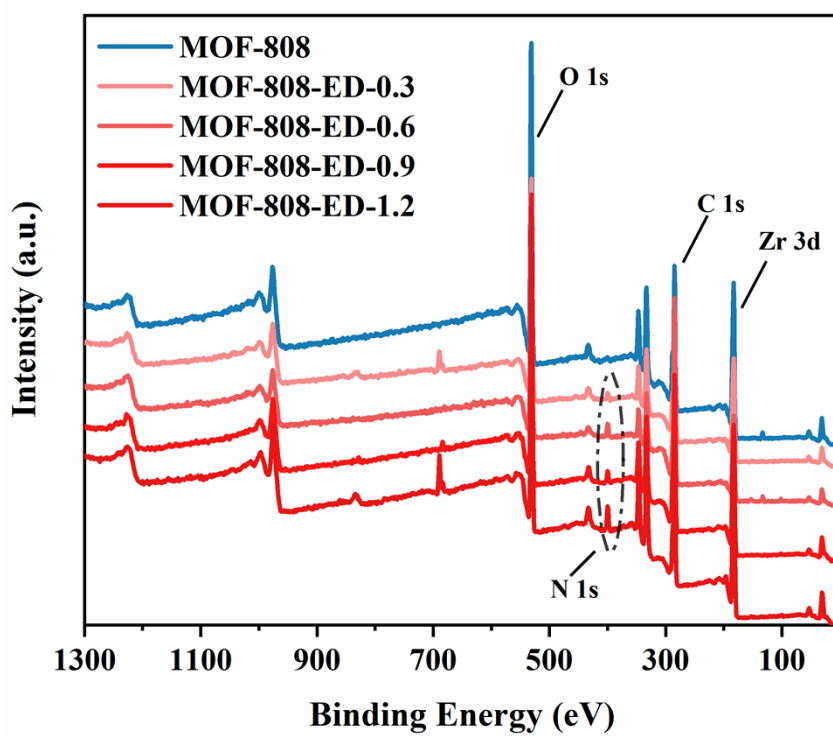

**Fig. S2** Wide-scan XPS spectra of MOF-808 and MOF-808-ED samples.

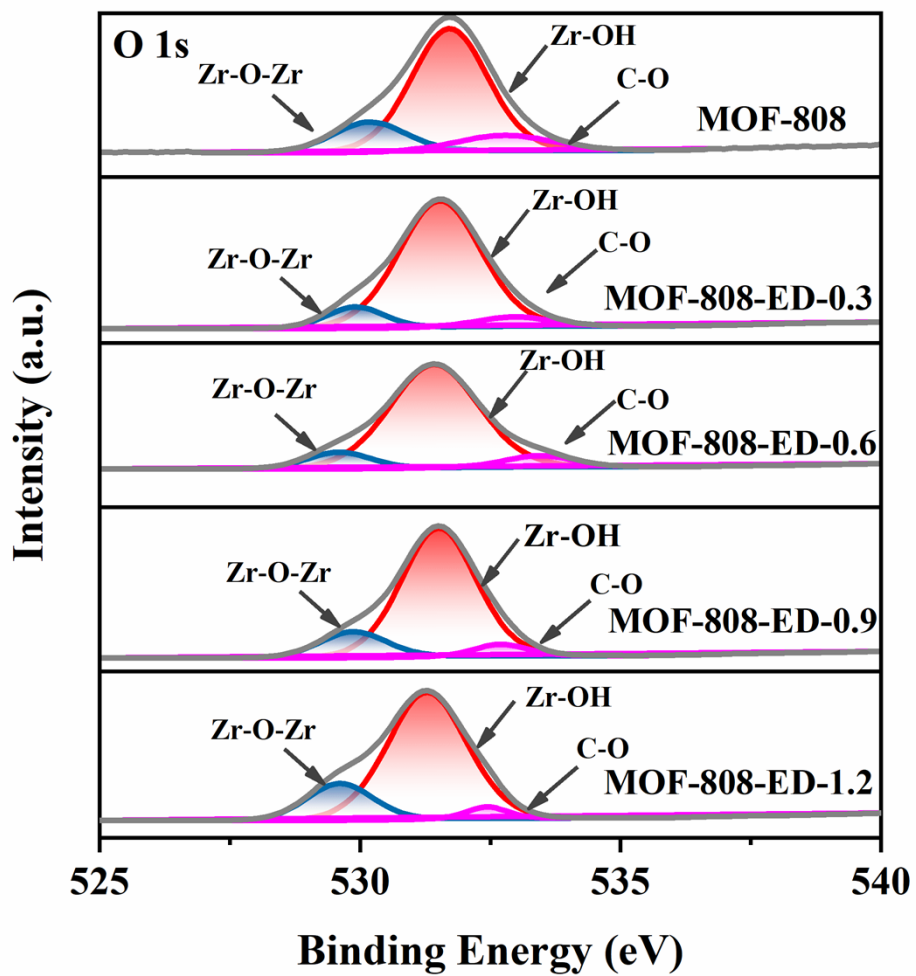

Fig. S3 O 1s XPS spectra of MOF-808 and MOF-808-ED samples.

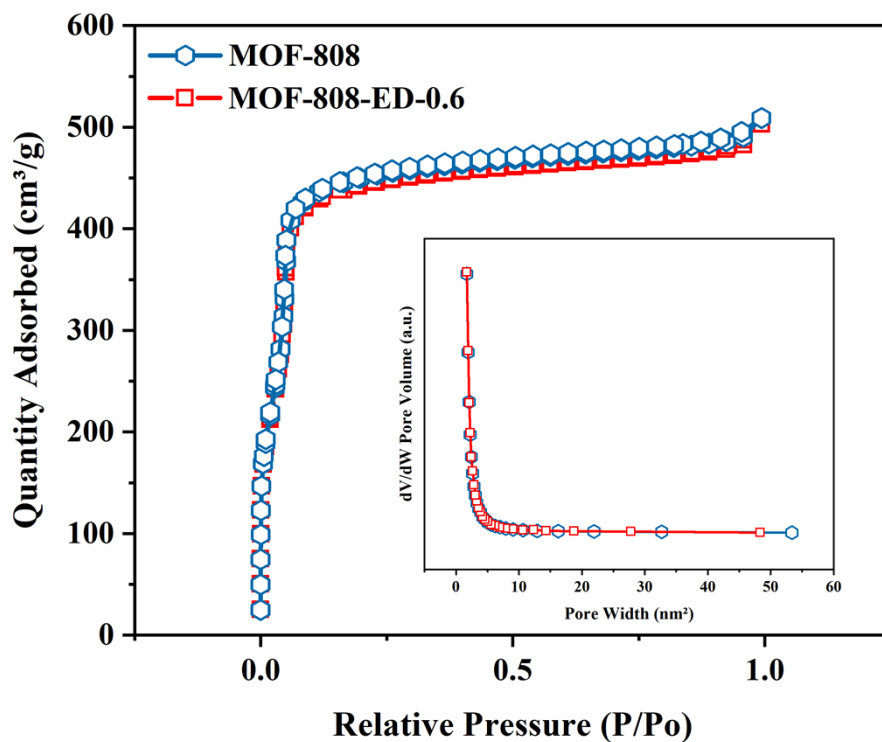

**Fig. S4** N<sub>2</sub> adsorption-desorption isotherms and pore-size distributions of MOF-808 and MOF-808-ED-0.6.

**Table S1.** BET surface areas and pore volumes of MOF-808s samples

| Sample         | BET Surface Area (m <sup>2</sup> ·g <sup>-1</sup> ) | Pore Volume (cm <sup>3</sup> ·g <sup>-1</sup> ) |
|----------------|-----------------------------------------------------|-------------------------------------------------|
| MOF-808        | 1357                                                | 0.54                                            |
| MOF-808-ED-0.6 | 1330                                                | 0.53                                            |

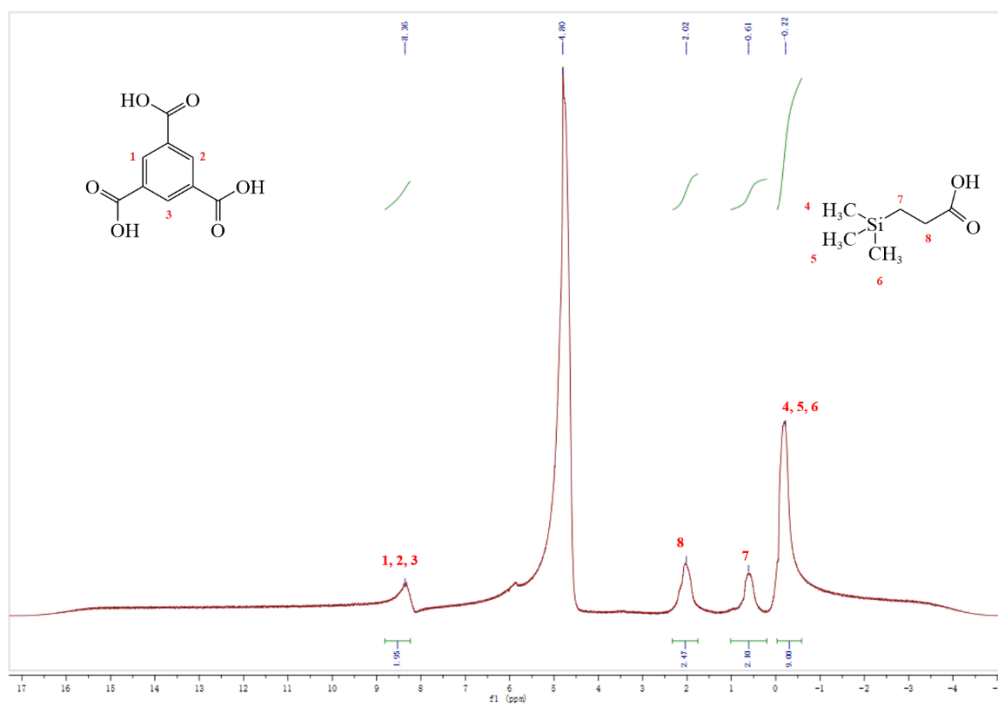

**Fig. S5**  $^1\text{H}$  NMR spectra of alkaline-digested (NaOH/D<sub>2</sub>O) MOF-808.

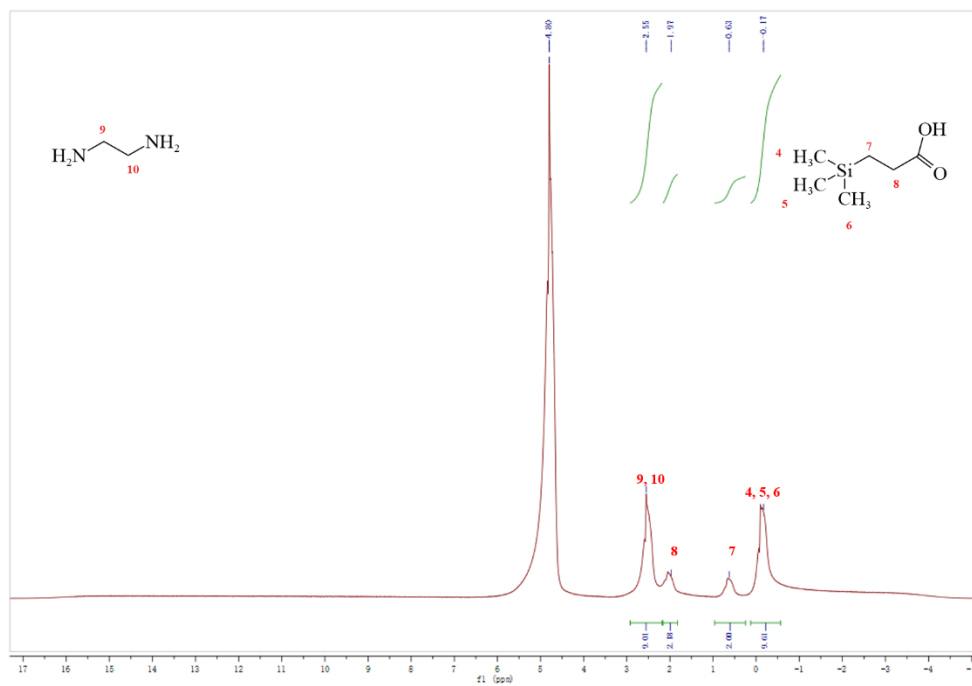

**Fig. S6**  $^1\text{H}$  NMR spectra of alkaline-digested ( $\text{NaOH}/\text{D}_2\text{O}$ ) ED.

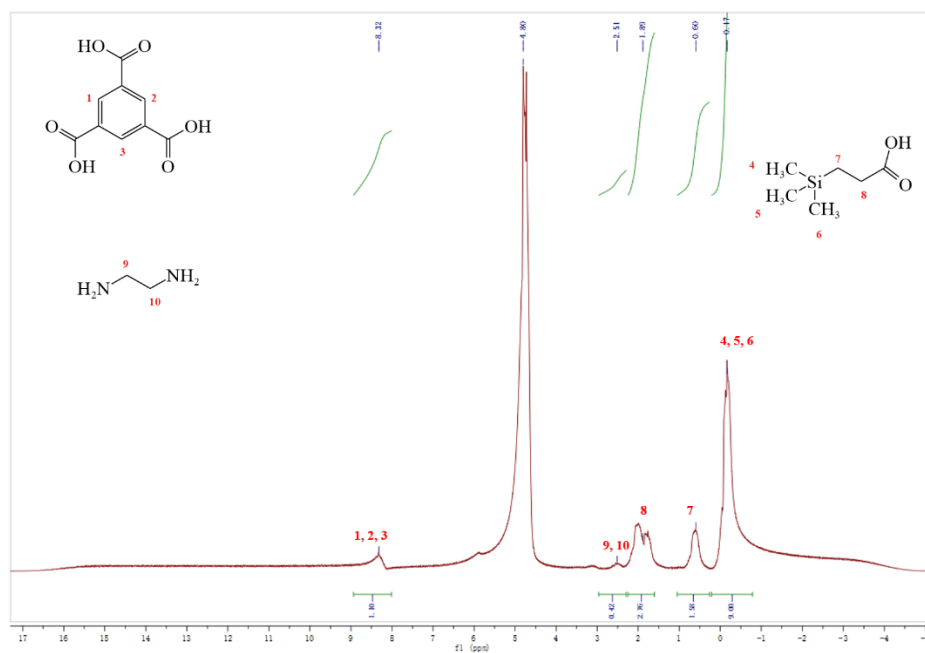

**Fig. S7**  $^1\text{H}$  NMR spectra of alkaline-digested ( $\text{NaOH}/\text{D}_2\text{O}$ ) MOF-808-ED-0.6.

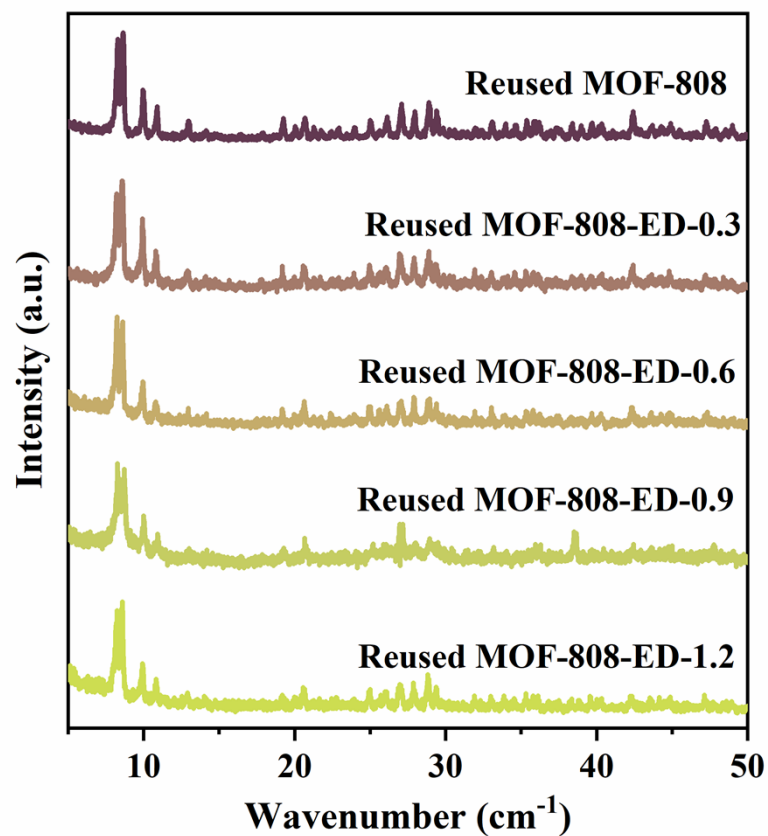

Fig. S8 XRD patterns of reused catalysts.

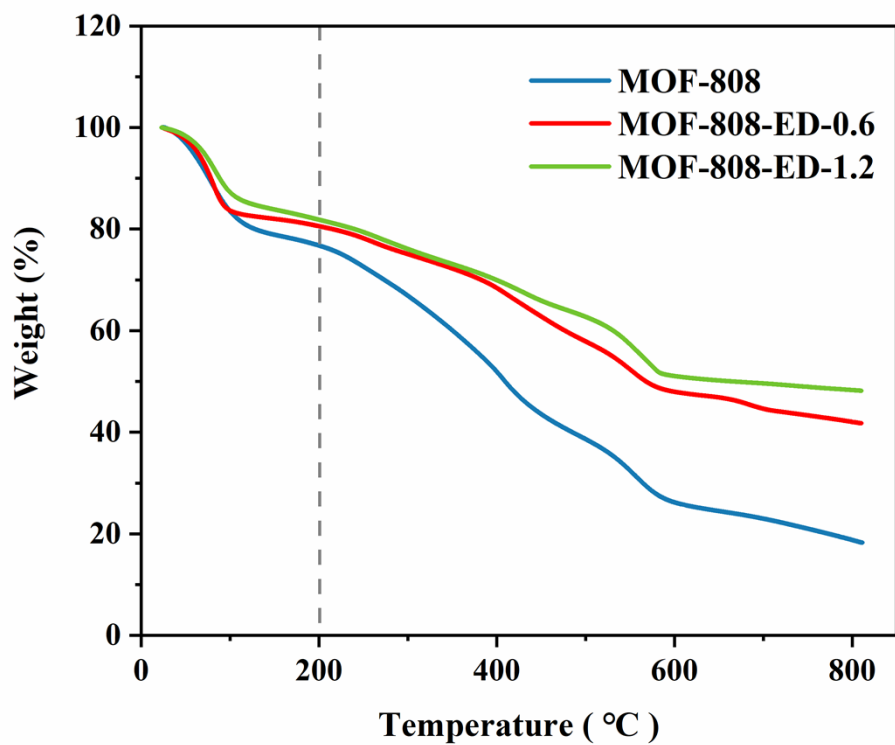



**Fig. S9** TGA profiles of MOF-808, MOF-808-ED-0.6 and MOF-808-ED-1.2.

Below 100 °C is the desorption of physically adsorbed water. The catalyst can remain stable at the reaction temperature (140 °C).

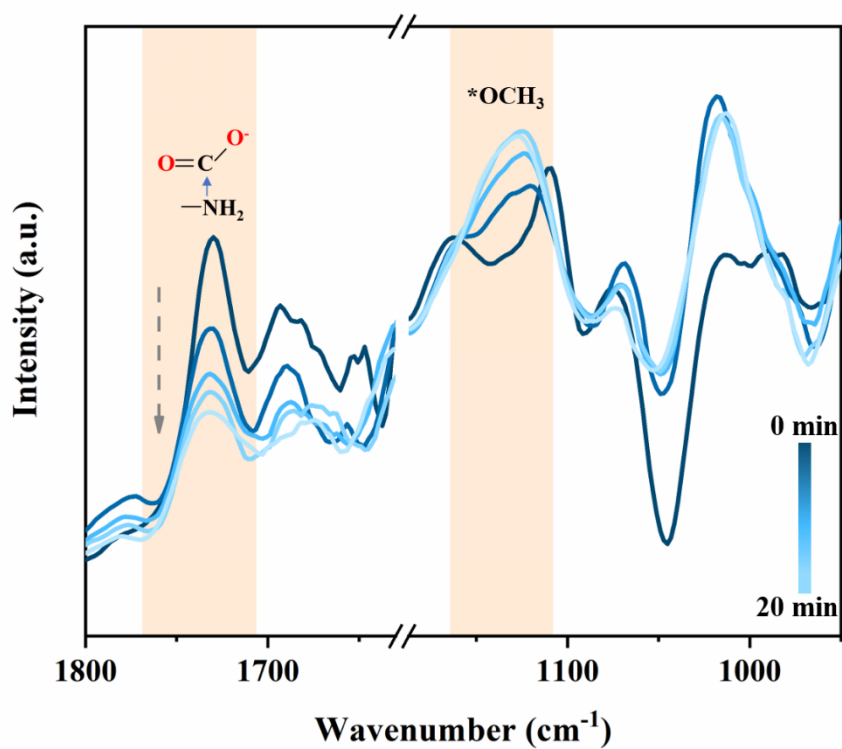

**Fig. S10** *In situ* DRIFTS spectra of CH<sub>3</sub>OH adsorption on CO<sub>2</sub>-pre-adsorbed MOF-808-ED-0.6.

**Table S2.** The mass fraction of Zr element in the catalyst

| catalyst       | Zr content<br>(wt%) |
|----------------|---------------------|
| MOF-808        | 30.1                |
| MOF-808-ED-0.3 | 24.3                |
| MOF-808-ED-0.6 | 25.9                |
| MOF-808-ED-0.9 | 24.4                |
| MOF-808-ED-1.2 | 24.9                |

**Table S3.** MOF catalysts reported in the literature

| Catalyst                | Dehydrating agent | Parameters to DMC synthesis | Yield (%) | DMC Yield (mmol·g <sup>-1</sup> ) | STY <sub>DMC</sub> (mmol·g <sup>-1</sup> ·h <sup>-1</sup> ) | TOF (h <sup>-1</sup> ) | Ref.      |
|-------------------------|-------------------|-----------------------------|-----------|-----------------------------------|-------------------------------------------------------------|------------------------|-----------|
| MOF-808-ED-0.3          | 2-CP              | 5 MPa, 140 °C, 3 h          | 15.46     | 19.02                             | 6.34                                                        | 2.39                   | This work |
| MOF-808-ED-0.6          | 2-CP              | 5 MPa, 140 °C, 3 h          | 17.63     | 21.69                             | 7.23                                                        | 2.54                   | This work |
| MOF-808-ED-0.9          | 2-CP              | 5 MPa, 140 °C, 3 h          | 15.10     | 18.57                             | 6.19                                                        | 2.29                   | This work |
| MOF-808-ED-1.2          | 2-CP              | 5 MPa, 140 °C, 3 h          | 15.27     | 18.78                             | 6.26                                                        | 2.27                   | This work |
| MOF-808-4               | TMM               | 12 MPa, 140 °C, 4 h         | 3.28      | 6.56                              | 1.64                                                        | 0.34                   | 1         |
| HPW@MOF-808             | TMM               | 12 MPa, 140 °C, 4 h         | 4.69      | 9.4                               | 2.35                                                        | -                      | 2         |
| UiO-66-24               | TMM               | 11 MPa, 140 °C, 4 h         | 2.14      | 4.28                              | 1.07                                                        | 0.05                   | 3         |
| Ce-UiO-66-2             | 2-CP              | 11 MPa, 140 °C, 4 h         | 0.13      | 1.34                              | 0.335                                                       | 0.099                  | 4         |
| Zr-Ce-MOF               | 2-CP              | 2.6 MPa, 150 °C, 9 h        | 0.61      | 4.59                              | 0.51                                                        | 0.92                   | 5         |
| Ce-Zr<br>oxide/graphene | TMM               | 12 MPa, 110 °C, 16 h        | 33.00     | 35.84                             | 2.24                                                        | -                      | 6         |

2-CP: 2-cyanopyridine; TMM: 1,1,1-trimethoxymethane.

**Table S4.** The amount of Zr in the reaction solution

| catalyst       | The amount of Zr<br>(mg) |
|----------------|--------------------------|
| MOF-808        | 0.815                    |
| MOF-808-ED-0.3 | 0.803                    |
| MOF-808-ED-0.6 | 0.815                    |
| MOF-808-ED-0.9 | 0.786                    |
| MOF-808-ED-1.2 | 0.793                    |

The amount of Zr element in these reaction solutions is all less than 1 mg, indicating that the catalytic process is indeed heterogeneous catalysis.

**Table S5.** Catalytic optimization summary table

| Catalyst       | Temperature<br>(°C) | CO <sub>2</sub> pressure <sup>a</sup><br>(MPa) | Reaction<br>pressure <sup>b</sup><br>(MPa) | 2-CP<br>(mmol) | DMC Yield<br>(mmol·g <sup>-1</sup> ) | STY <sub>DMC</sub><br>(mmol·g <sup>-1</sup> ·h <sup>-1</sup> ) | TOF<br>(h <sup>-1</sup> ) |
|----------------|---------------------|------------------------------------------------|--------------------------------------------|----------------|--------------------------------------|----------------------------------------------------------------|---------------------------|
| MOF-808-ED-0.6 | 180                 | 5                                              | 8.5                                        | 3              | 48.60                                | 16.20                                                          | 5.68                      |
| MOF-808-ED-0.6 | 160                 | 5                                              | 8                                          | 3              | 38.13                                | 12.71                                                          | 4.46                      |
| MOF-808-ED-0.6 | 140                 | 5                                              | 7                                          | 3              | 21.69                                | 7.23                                                           | 2.54                      |
| MOF-808-ED-0.6 | 120                 | 5                                              | 6.5                                        | 3              | 1.62                                 | 0.54                                                           | 0.19                      |
| MOF-808-ED-0.6 | 100                 | 5                                              | 6                                          | 3              | 0.42                                 | 0.14                                                           | 0.05                      |
| MOF-808-ED-0.6 | 140                 | 4                                              | 6                                          | 3              | 19.53                                | 6.51                                                           | 2.29                      |
| MOF-808-ED-0.6 | 140                 | 3                                              | 5                                          | 3              | 14.55                                | 4.85                                                           | 1.70                      |
| MOF-808-ED-0.6 | 140                 | 2                                              | 4                                          | 3              | 10.41                                | 3.47                                                           | 1.22                      |
| MOF-808-ED-0.6 | 140                 | 1                                              | 3                                          | 3              | 2.94                                 | 0.98                                                           | 0.34                      |
| MOF-808-ED-0.6 | 140                 | 5                                              | 7                                          | 4              | 13.77                                | 4.59                                                           | 1.61                      |
| MOF-808-ED-0.6 | 140                 | 5                                              | 7                                          | 5              | 15.42                                | 5.14                                                           | 1.80                      |
| MOF-808-ED-0.6 | 140                 | 5                                              | 7                                          | 2              | 14.37                                | 4.79                                                           | 1.68                      |
| MOF-808-ED-0.6 | 140                 | 5                                              | 7                                          | 1              | 12.96                                | 4.32                                                           | 1.52                      |

<sup>a</sup> Initial CO<sub>2</sub> pressure

<sup>b</sup> System pressure during the reaction

## Reference

1. K. Xuan, Y. Pu, F. Li, J. Luo, N. Zhao and F. Xiao, *Chin. J. Catal.*, 2019, **40**, 553–566.
2. K. Xuan, S. Chen, Y. Pu, Y. Guo, Y. Guo, Y. Li, C. Pu, N. Zhao and F. Xiao, *J. CO<sub>2</sub> Util.*, 2022, **59**, 101960.
3. K. Xuan, Y. Pu, F. Li, A. Li, J. Luo, L. Li, F. Wang, N. Zhao and F. Xiao, *J. CO<sub>2</sub> Util.*, 2018, **27**, 272-282.
4. L. Huo, L. Wang, J. Li, Y. Pu, K. Xuan, C. Qiao and H. Yang, *J. CO<sub>2</sub> Util.*, 2023, **68**, 102352.
5. J. Bai, Z. Song, L. Liu, X. Zhu, F. Gao and R. V. Chaudhari, *RSC Adv.*, 2022, **12**, 26307-26318.
6. R. Saada, S. Kellici, T. Heil, D. Morgan and B. Saha, *Appl. Catal., B*, 2015, **168-169**, 353-362.
